# Supplementary material
Source: HighWire-hosted journal article supplement (https://www.rcpjournals.org/highwire/filestream/13983/field_highwire_adjunct_files/0/Paramanathan_supplementary_material_S1.pdf)
Supplement: Paramanathan_supplementary_material_S1.pdf [file Paramanathan_supplementary_material_S1.pdf]

## S1. Designs and demographics of included studies

| Article Name                                                                                                                                                      | Details                  |                                                                                                                                |
|-------------------------------------------------------------------------------------------------------------------------------------------------------------------|--------------------------|--------------------------------------------------------------------------------------------------------------------------------|
| Racial and Ethnic Disparities in Uptake and Location of Vaccination for 2009-H1N1 and Seasonal Influenza <sup>12</sup>                                            | <b>Design</b>            | Cohort                                                                                                                         |
|                                                                                                                                                                   | <b>Sample Size</b>       | White (n = 1808) Black (n = 1141) Hispanic (n = 588)                                                                           |
|                                                                                                                                                                   | <b>Date</b>              | 2011                                                                                                                           |
|                                                                                                                                                                   | <b>Populations</b>       | Hispanic<br>Whites-Non HSP<br>Black-Non HSP                                                                                    |
|                                                                                                                                                                   | <b>Location</b>          | USA                                                                                                                            |
|                                                                                                                                                                   | <b>Nature of Article</b> | Vaccination uptake<br>Clinic availability<br>Trust to government                                                               |
| Predictors of knowledge of H1N1 infection and transmission in the U.S. population <sup>31</sup>                                                                   | <b>Design</b>            | Cohort                                                                                                                         |
|                                                                                                                                                                   | <b>Sample Size</b>       | 1,569                                                                                                                          |
|                                                                                                                                                                   | <b>Date</b>              | 2010                                                                                                                           |
|                                                                                                                                                                   | <b>Populations</b>       | black<br>white<br>hispanic                                                                                                     |
|                                                                                                                                                                   | <b>Location</b>          | Massachuset/ USA                                                                                                               |
|                                                                                                                                                                   | <b>Nature of Article</b> | Knowledge and education about H1N1 and vaccination<br>Socioeconomic status and level of education<br>Availability of education |
| Public Acceptance of Peramivir During the 2009 H1N1 Influenza Pandemic: Implications for Other Drugs or Vaccines Under Emergency Use Authorizations <sup>26</sup> | <b>Design</b>            | Cohort                                                                                                                         |
|                                                                                                                                                                   | <b>Sample Size</b>       | 2079                                                                                                                           |
|                                                                                                                                                                   | <b>Date</b>              | 2010                                                                                                                           |
|                                                                                                                                                                   | <b>Populations</b>       | White<br>Black<br>Hispanics                                                                                                    |
|                                                                                                                                                                   | <b>Location</b>          | USA                                                                                                                            |
|                                                                                                                                                                   | <b>Nature of Article</b> | Trust of people towards government<br>Comorbidity and willingness to get vaccine                                               |

|                                                                                                                                                                            |                          |                                                                                                     |
|----------------------------------------------------------------------------------------------------------------------------------------------------------------------------|--------------------------|-----------------------------------------------------------------------------------------------------|
| Public Willingness to Take a Vaccine or Drug Under Emergency Use Authorization during the 2009 H1N1 Pandemic <sup>13</sup>                                                 | <b>Design</b>            | Cohort                                                                                              |
|                                                                                                                                                                            | <b>Sample Size</b>       | 2,498>1,543                                                                                         |
|                                                                                                                                                                            | <b>Date</b>              | 2019                                                                                                |
|                                                                                                                                                                            | <b>Populations</b>       | White<br>Hispanic<br>Black                                                                          |
|                                                                                                                                                                            | <b>Location</b>          | USA                                                                                                 |
|                                                                                                                                                                            | <b>Nature of Article</b> | Vaccination uptake , impacted by trust in government , past experiences with pandemics such as SARS |
| Race-related differences in antibody responses to the inactivated influenza vaccine are linked to distinct pre-vaccination gene expression profiles in blood <sup>32</sup> | <b>Design</b>            | Cohort                                                                                              |
|                                                                                                                                                                            | <b>Sample Size</b>       | 270(27AA,246W,6others)                                                                              |
|                                                                                                                                                                            | <b>Date</b>              | 2016                                                                                                |
|                                                                                                                                                                            | <b>Populations</b>       | 270(27AA,246W,6others)                                                                              |
|                                                                                                                                                                            | <b>Location</b>          | USA                                                                                                 |
|                                                                                                                                                                            | <b>Nature of Article</b> | Different antigen response to vaccine in different races                                            |
| Trust During the Early Stages of the 2009 H1N1 Pandemic <sup>33</sup>                                                                                                      | <b>Design</b>            | Cohort                                                                                              |
|                                                                                                                                                                            | <b>Sample Size</b>       | 1543                                                                                                |
|                                                                                                                                                                            | <b>Date</b>              | 2009                                                                                                |
|                                                                                                                                                                            | <b>Populations</b>       | african american/<br>hispanic / white                                                               |
|                                                                                                                                                                            | <b>Location</b>          | USA                                                                                                 |
|                                                                                                                                                                            | <b>Nature of Article</b> | Trust towards healthcare and government / healthcare impacted by income and education               |
| The Impact of Workplace Policies and Other Social Factors on Self-Reported Influenza-Like Illness Incidence During the 2009 H1N1 Pandemic <sup>34</sup>                    | <b>Design</b>            | Not specified                                                                                       |
|                                                                                                                                                                            | <b>Sample Size</b>       | 2079                                                                                                |
|                                                                                                                                                                            | <b>Date</b>              | 2010                                                                                                |
|                                                                                                                                                                            | <b>Populations</b>       | White<br>non-Hispanic, Black non-Hispanic, or Hispanic                                              |
|                                                                                                                                                                            | <b>Location</b>          | USA                                                                                                 |

|                                                                                                                           |                                                                                                                                                                                                  |                                                                                                                                                                         |
|---------------------------------------------------------------------------------------------------------------------------|--------------------------------------------------------------------------------------------------------------------------------------------------------------------------------------------------|-------------------------------------------------------------------------------------------------------------------------------------------------------------------------|
|                                                                                                                           | <b>Nature of Article</b>                                                                                                                                                                         | Factors contributing in to different race exposures                                                                                                                     |
| Socioeconomic status, demographics, beliefs and A(H1N1) vaccine uptake in the United States <sup>35</sup>                 | <b>Design</b>                                                                                                                                                                                    | Not specified                                                                                                                                                           |
|                                                                                                                           | <b>Sample Size</b>                                                                                                                                                                               | 1569                                                                                                                                                                    |
|                                                                                                                           | <b>Date</b>                                                                                                                                                                                      | 2010                                                                                                                                                                    |
|                                                                                                                           | <b>Populations</b>                                                                                                                                                                               | white<br>black<br>hispanic<br>others                                                                                                                                    |
|                                                                                                                           | <b>Location</b>                                                                                                                                                                                  | USA                                                                                                                                                                     |
|                                                                                                                           | <b>Nature of Article</b>                                                                                                                                                                         | Vaccination uptake and efficacy related to socioeconomic status<br>work-related inability engage in social distancing /<br>household crowding<br>living in an apartment |
|                                                                                                                           | Socio-demographic differences in opinions about 2009 pandemic influenza A (H1N1) and seasonal influenza vaccination and disease among adults during the 2009-2010 influenza season <sup>36</sup> | <b>Design</b>                                                                                                                                                           |
| <b>Sample Size</b>                                                                                                        |                                                                                                                                                                                                  | 55850                                                                                                                                                                   |
| <b>Date</b>                                                                                                               |                                                                                                                                                                                                  | 2009                                                                                                                                                                    |
| <b>Populations</b>                                                                                                        |                                                                                                                                                                                                  | Black<br>Hispanic<br>White<br>Others                                                                                                                                    |
| <b>Location</b>                                                                                                           |                                                                                                                                                                                                  | USA                                                                                                                                                                     |
| <b>Nature of Article</b>                                                                                                  |                                                                                                                                                                                                  | Vaccinations availability, education and acceptance in different races based on different socio-economic levels                                                         |
| Racial Disparities in Exposure, susceptibility, and Access to Health Care in the US H1N1 Influenza Pandemic <sup>37</sup> | <b>Design</b>                                                                                                                                                                                    | Cohort                                                                                                                                                                  |
|                                                                                                                           | <b>Sample Size</b>                                                                                                                                                                               | 1479                                                                                                                                                                    |
|                                                                                                                           | <b>Date</b>                                                                                                                                                                                      | 2009                                                                                                                                                                    |
|                                                                                                                           | <b>Populations</b>                                                                                                                                                                               | Not specified                                                                                                                                                           |
|                                                                                                                           | <b>Location</b>                                                                                                                                                                                  | Not specified                                                                                                                                                           |
|                                                                                                                           | <b>Nature of Article</b>                                                                                                                                                                         | Access to healthcare                                                                                                                                                    |

|                                                                                                                                                           |                                                                                                                                                                                                                |                                                                                                                                                                                |
|-----------------------------------------------------------------------------------------------------------------------------------------------------------|----------------------------------------------------------------------------------------------------------------------------------------------------------------------------------------------------------------|--------------------------------------------------------------------------------------------------------------------------------------------------------------------------------|
| Adoption of preventive behaviors in response to the 2009 H1N1 influenza pandemic: a multiethnic perspective <sup>17</sup>                                 | <b>Design</b>                                                                                                                                                                                                  | Cross-sectional telephone poll                                                                                                                                                 |
|                                                                                                                                                           | <b>Sample Size</b>                                                                                                                                                                                             | 2,300                                                                                                                                                                          |
|                                                                                                                                                           | <b>Date</b>                                                                                                                                                                                                    | Mar 17 - Apr 11 2010                                                                                                                                                           |
|                                                                                                                                                           | <b>Populations</b>                                                                                                                                                                                             | 1123 White<br>330 Black<br>317 Hispanic<br>268 Asian<br>262 natives                                                                                                            |
|                                                                                                                                                           | <b>Location</b>                                                                                                                                                                                                | USA (random phone calls)                                                                                                                                                       |
|                                                                                                                                                           | <b>Nature of Article</b>                                                                                                                                                                                       | Adoption of preventative behaviours (eg. hygiene, social distancing, other healthcare related behaviours)                                                                      |
|                                                                                                                                                           | Association of influenza vaccine uptake with health, access to health care, and medical mistreatment among adults from low-income neighborhoods in New Haven, CT: A classification tree analysis <sup>25</sup> | <b>Design</b>                                                                                                                                                                  |
| <b>Sample Size</b>                                                                                                                                        |                                                                                                                                                                                                                | 1,178/1,300                                                                                                                                                                    |
| <b>Date</b>                                                                                                                                               |                                                                                                                                                                                                                | Sep – Nov, 2012                                                                                                                                                                |
| <b>Populations</b>                                                                                                                                        |                                                                                                                                                                                                                | 114 white<br>727 Black<br>239 Hispanic<br>91 other                                                                                                                             |
| <b>Location</b>                                                                                                                                           |                                                                                                                                                                                                                | New Haven, Connecticut: low income neighborhoods                                                                                                                               |
| <b>Nature of Article</b>                                                                                                                                  |                                                                                                                                                                                                                | Influenza vaccination rates, rates of comorbidities, rates of health insurance, rates of medical mistreatment, rates of frequency of doctor visits, rates of health behaviours |
| Can Routine Offering of Influenza Vaccination in Office-Based Settings Reduce Racial and Ethnic Disparities in Adult Influenza Vaccination? <sup>24</sup> |                                                                                                                                                                                                                | <b>Design</b>                                                                                                                                                                  |
|                                                                                                                                                           | <b>Sample Size</b>                                                                                                                                                                                             | 3,418                                                                                                                                                                          |
|                                                                                                                                                           | <b>Date</b>                                                                                                                                                                                                    | Mar 4 – 14, 2010                                                                                                                                                               |
|                                                                                                                                                           | <b>Populations</b>                                                                                                                                                                                             | 1760 White<br>1089 Black<br>569 Hispanic                                                                                                                                       |
|                                                                                                                                                           | <b>Location</b>                                                                                                                                                                                                | USA national survey                                                                                                                                                            |
|                                                                                                                                                           | <b>Nature of Article</b>                                                                                                                                                                                       | Vaccination rates, HCP visits vs. HCP recommendation rates                                                                                                                     |
|                                                                                                                                                           |                                                                                                                                                                                                                | <b>Design</b>                                                                                                                                                                  |

|                                                                                                                                  |                                                                                  |                                                                                                                                    |
|----------------------------------------------------------------------------------------------------------------------------------|----------------------------------------------------------------------------------|------------------------------------------------------------------------------------------------------------------------------------|
| Categorical and anti-categorical approaches to US racial/ethnic groupings: revisiting the National 2009 H1N1 Flu Survey (NHFS)38 | <b>Sample Size</b>                                                               | 56,434                                                                                                                             |
|                                                                                                                                  | <b>Date</b>                                                                      | Oct 2009 – June 2010                                                                                                               |
|                                                                                                                                  | <b>Populations</b>                                                               | 44909 White<br>4553 Black<br>3651 Hispanic<br>33221 Other                                                                          |
|                                                                                                                                  | <b>Location</b>                                                                  | USA national survey                                                                                                                |
|                                                                                                                                  | <b>Nature of Article</b>                                                         | Vaccination rates                                                                                                                  |
|                                                                                                                                  | Determinants of healthcare provider recommendations for influenza vaccinations14 | <b>Design</b>                                                                                                                      |
| <b>Sample Size</b>                                                                                                               |                                                                                  | Not specified                                                                                                                      |
| <b>Date</b>                                                                                                                      |                                                                                  | Jan – June, 2010 (focus)                                                                                                           |
| <b>Populations</b>                                                                                                               |                                                                                  | White<br>Black<br>Hispanic<br>Other                                                                                                |
| <b>Location</b>                                                                                                                  |                                                                                  | USA national survey                                                                                                                |
| <b>Nature of Article</b>                                                                                                         |                                                                                  | Vaccination rates, HCP recommendation rates, vs. insurance/comorbidities/attitudes towards vaccines/age/frequency of doctor visits |
| Disparities among 2009 Pandemic Influenza A (H1N1) Hospital Admissions: A Mixed Methods                                          | <b>Design</b>                                                                    | Mixed method analysis: quantitative (surveillance) and qualitative (interview)                                                     |
|                                                                                                                                  | <b>Sample Size</b>                                                               | 2824 surveillance; 33/120 interviewed                                                                                              |
|                                                                                                                                  | <b>Date</b>                                                                      | April – Dec, 2009                                                                                                                  |

|                                                                                                                                                                   |                          |                                                                                                                                                                                                                                                                                                                             |
|-------------------------------------------------------------------------------------------------------------------------------------------------------------------|--------------------------|-----------------------------------------------------------------------------------------------------------------------------------------------------------------------------------------------------------------------------------------------------------------------------------------------------------------------------|
| Analysis – Illinois, April–December 2009 <sup>39</sup>                                                                                                            | <b>Populations</b>       | <p>Surveillance:</p> <ul style="list-style-type: none"> <li>1068 White</li> <li>707 Black</li> <li>680 Hispanic</li> <li>107 Asian</li> <li>6 Native</li> <li>63 Other</li> <li>193 Unknown</li> </ul> <p>Interviews:</p> <ul style="list-style-type: none"> <li>13 White</li> <li>10 Black</li> <li>10 Hispanic</li> </ul> |
|                                                                                                                                                                   | <b>Location</b>          | Illinois, USA                                                                                                                                                                                                                                                                                                               |
|                                                                                                                                                                   | <b>Nature of Article</b> | Mortality rates, Hospitalization rates, vs. comorbidities, barriers in access to healthcare                                                                                                                                                                                                                                 |
|                                                                                                                                                                   | <b>Design</b>            | Cross-sectional survey                                                                                                                                                                                                                                                                                                      |
| Factors associated with differential uptake of seasonal influenza immunizations among underserved communities during the 2009–2010 influenza season <sup>28</sup> | <b>Sample Size</b>       | 991                                                                                                                                                                                                                                                                                                                         |
|                                                                                                                                                                   | <b>Date</b>              | Feb – July, 2010                                                                                                                                                                                                                                                                                                            |
|                                                                                                                                                                   | <b>Populations</b>       | <ul style="list-style-type: none"> <li>55% Hispanic</li> <li>45% Black</li> </ul>                                                                                                                                                                                                                                           |
|                                                                                                                                                                   | <b>Location</b>          | Harlem & South Bronx, New York                                                                                                                                                                                                                                                                                              |
|                                                                                                                                                                   | <b>Nature of Article</b> | Influenza vaccination rates vs. attitudes towards vaccines, health insurance, trust in gov, concern                                                                                                                                                                                                                         |
| Factors Mediating Seasonal and Influenza A (H1N1) Vaccine Acceptance among Ethnically Diverse Populations in the Urban South <sup>16</sup>                        | <b>Design</b>            | Cross-sectional survey                                                                                                                                                                                                                                                                                                      |
|                                                                                                                                                                   | <b>Sample Size</b>       | 503                                                                                                                                                                                                                                                                                                                         |
|                                                                                                                                                                   | <b>Date</b>              | Sept – Dec, 2009                                                                                                                                                                                                                                                                                                            |
|                                                                                                                                                                   | <b>Populations</b>       | <ul style="list-style-type: none"> <li>399 Black</li> <li>31 Hispanic</li> <li>28 Multiracial</li> <li>12 Asian</li> <li>6 Native</li> </ul>                                                                                                                                                                                |

|                                                                                                         |                                                                               |                                                                                                |
|---------------------------------------------------------------------------------------------------------|-------------------------------------------------------------------------------|------------------------------------------------------------------------------------------------|
|                                                                                                         |                                                                               | 27 Didn't say                                                                                  |
|                                                                                                         | <b>Location</b>                                                               | Metropolitan Atlanta, Georgia                                                                  |
|                                                                                                         | <b>Nature of Article</b>                                                      | Vaccination acceptability rates vs mistrust, hx of medical mistreatment, attitudes of vaccines |
| Pandemics and Health Equity: Lessons Learned from the H1N1 Response in Los Angeles County <sup>15</sup> | <b>Design</b>                                                                 | Vaccinations + cross-sectional telephone survey                                                |
|                                                                                                         | <b>Sample Size</b>                                                            | 163,087 (vaccinated); 1750 (surveyed)                                                          |
|                                                                                                         | <b>Date</b>                                                                   | Oct 23 – Dec 08, 2009 (vaccinations); Dec 16, 2009 – Mar 08, 2010 (surveys)                    |
|                                                                                                         | <b>Populations</b>                                                            | Black<br>White<br>Asian<br>Hispanic<br>Native<br>Pacific Islander                              |
|                                                                                                         | <b>Location</b>                                                               | Los Angeles County, California                                                                 |
|                                                                                                         | <b>Nature of Article</b>                                                      | Vaccination rates, Health beliefs / Attitudes towards vaccination                              |
|                                                                                                         | Assessing Differential Impacts of COVID-19 on Black Communities <sup>20</sup> | <b>Design</b>                                                                                  |
| <b>Sample Size</b>                                                                                      |                                                                               | -3142 US counties                                                                              |
| <b>Date</b>                                                                                             |                                                                               | -Not specified                                                                                 |
| <b>Populations</b>                                                                                      |                                                                               | -656 disproportionately Black counties and 2465 other counties                                 |
| <b>Location</b>                                                                                         |                                                                               | -US nationwide                                                                                 |
| <b>Nature of Article</b>                                                                                |                                                                               | -Racial disparities in COVID-19 disease and death & associated determinants                    |

|                                                                                                                                                                                             |                          |                                                                                                                                                                            |
|---------------------------------------------------------------------------------------------------------------------------------------------------------------------------------------------|--------------------------|----------------------------------------------------------------------------------------------------------------------------------------------------------------------------|
| Awareness, Attitudes, and Actions Related to COVID-19 Among Adults With Chronic Conditions at The Onset of The US Outbreak <sup>18</sup>                                                    | <b>Design</b>            | -Cross-sectional and cohort studies                                                                                                                                        |
|                                                                                                                                                                                             | <b>Sample Size</b>       | -630 adults                                                                                                                                                                |
|                                                                                                                                                                                             | <b>Date</b>              | -March 13th - 20th, 2020                                                                                                                                                   |
|                                                                                                                                                                                             | <b>Populations</b>       | -23-88 year old Blacks, Whites, Hispanics, and Others with 1+ chronic medical conditions                                                                                   |
|                                                                                                                                                                                             | <b>Location</b>          | -5 academic internal medicine practices and 2 federally qualified health centres in Chicago, Illinois                                                                      |
|                                                                                                                                                                                             | <b>Nature of Article</b> | -COVID-19 awareness, knowledge, attitudes, and related behaviours among US adults who are more vulnerable to complications of infection due to age and comorbid conditions |
| Black-White Risk Differentials in COVID-19 (SARS-COV2) Transmission, Mortality and Case Fatality in The United States: Translational Epidemiologic Perspective and Challenges <sup>29</sup> | <b>Design</b>            | -Data stimulation and cross-sectional study                                                                                                                                |
|                                                                                                                                                                                             | <b>Sample Size</b>       | -9 states                                                                                                                                                                  |
|                                                                                                                                                                                             | <b>Date</b>              | -April 2020                                                                                                                                                                |
|                                                                                                                                                                                             | <b>Populations</b>       | -Blacks/ AA, Whites, Asians, and Others                                                                                                                                    |
|                                                                                                                                                                                             | <b>Location</b>          | WI, MI, LU, IL, MD, NC, NJ, NY, and CA                                                                                                                                     |
|                                                                                                                                                                                             | <b>Nature of Article</b> | Race & COVID-19 transmission, mortality, and case fatality                                                                                                                 |
| Covid-19 by Race and Ethnicity: A National Cohort Study of 6 Million United States Veterans <sup>21</sup>                                                                                   | <b>Design</b>            | Cohort study                                                                                                                                                               |
|                                                                                                                                                                                             | <b>Sample Size</b>       | 5, 834, 543 US Veterans                                                                                                                                                    |
|                                                                                                                                                                                             | <b>Date</b>              | February 8th - May 4th, 2020                                                                                                                                               |
|                                                                                                                                                                                             | <b>Populations</b>       | Non-Hispanic Whites/ Whites, Non-Hispanic Blacks/ Blacks, and Hispanics                                                                                                    |
|                                                                                                                                                                                             | <b>Location</b>          | US nationwide                                                                                                                                                              |



|                                                                                                             |                          |                                                                                                                                                                                                                            |
|-------------------------------------------------------------------------------------------------------------|--------------------------|----------------------------------------------------------------------------------------------------------------------------------------------------------------------------------------------------------------------------|
|                                                                                                             | <b>Nature of Article</b> | Patterns of testing and test results for COVID-19 & mortality by race and ethnicity in the largest integrated healthcare system in US                                                                                      |
| Disparities in COVID-19 Reported Incidence, Knowledge, and Behaviour <sup>19</sup>                          | <b>Design</b>            | Linear regression and cohort study                                                                                                                                                                                         |
|                                                                                                             | <b>Sample Size</b>       | 5198 US citizens                                                                                                                                                                                                           |
|                                                                                                             | <b>Date</b>              | March 29th - April 13th, 2020                                                                                                                                                                                              |
|                                                                                                             | <b>Populations</b>       | Whites, Blacks, and Hispanics                                                                                                                                                                                              |
|                                                                                                             | <b>Location</b>          | US nationwide                                                                                                                                                                                                              |
|                                                                                                             | <b>Nature of Article</b> | Knowledge, beliefs, and behaviours regarding COVID-19                                                                                                                                                                      |
| Disparities in Outcomes Among COVID-19 Patients in A Large Health Care System in California <sup>27</sup>   | <b>Design</b>            | Cohort study                                                                                                                                                                                                               |
|                                                                                                             | <b>Sample Size</b>       | 14, 036 COVID-19 patients                                                                                                                                                                                                  |
|                                                                                                             | <b>Date</b>              | January 1st - April 8th, 2020                                                                                                                                                                                              |
|                                                                                                             | <b>Populations</b>       | Whites, Hispanics, Asians, Black/ AA, and Others (American Indian, Alaskan Native, mixed race, declined to state, unknown) who were 18+ with at least 1 encounter with Sutter Health between January 1st - April 8th, 2020 |
|                                                                                                             | <b>Location</b>          | Sutter Health in northern California across 22 counties                                                                                                                                                                    |
|                                                                                                             | <b>Nature of Article</b> | Adults with suspected and confirmed COVID-19 & risk of hospitalization                                                                                                                                                     |
| Improved Measurement of Racial/ Ethnic Disparities in COVID-19 Mortality in The United States <sup>40</sup> | <b>Design</b>            | Indirect standardization                                                                                                                                                                                                   |
|                                                                                                             | <b>Sample Size</b>       | 322 US counties                                                                                                                                                                                                            |
|                                                                                                             | <b>Date</b>              | COVID-19 outbreak - May 13th, 2020                                                                                                                                                                                         |
|                                                                                                             | <b>Populations</b>       | Non-Hispanic African Americans/ Blacks, non-Hispanic Whites/ Whites, non-Hispanic Asians/ Asians, and Hispanics of any race/ Hispanics                                                                                     |

|                                                                                                        |                          |                                                                                                                      |
|--------------------------------------------------------------------------------------------------------|--------------------------|----------------------------------------------------------------------------------------------------------------------|
|                                                                                                        | <b>Location</b>          | US nationwide                                                                                                        |
|                                                                                                        | <b>Nature of Article</b> | Racial/ ethnic groups & COVID-19 mortality by age and place                                                          |
| Racial Disparities in Knowledge, Attitudes, and Practices Related to COVID-19 in the USA <sup>23</sup> | <b>Design</b>            | Cohort study                                                                                                         |
|                                                                                                        | <b>Sample Size</b>       | 1216 adults                                                                                                          |
|                                                                                                        | <b>Date</b>              | March 11th - 15th, 2020                                                                                              |
|                                                                                                        | <b>Populations</b>       | Whites, Blacks, Hispanics, and Asians or Multiracials who were 18+ living in USA (including Alaska and Hawaii)       |
|                                                                                                        | <b>Location</b>          | US nationwide                                                                                                        |
|                                                                                                        | <b>Nature of Article</b> | Racial disparities & knowledge, attitudes, and practises related to COVID-19                                         |
| Racial, Economic and Health Inequality and COVID-19 Infection in the United States <sup>41</sup>       | <b>Design</b>            | Cross-sectional study                                                                                                |
|                                                                                                        | <b>Sample Size</b>       | 369 US counties (102, 178, 117 people)                                                                               |
|                                                                                                        | <b>Date</b>              | COVID-19 outbreak - April 9th, 2020                                                                                  |
|                                                                                                        | <b>Populations</b>       | Asians, Blacks, Hispanics, and Whites                                                                                |
|                                                                                                        | <b>Location</b>          | 7 most affected states across US: Michigan, New York, New Jersey, Pennsylvania, California, Louisiana, Massachusetts |
|                                                                                                        | <b>Nature of Article</b> | COVID-19 infection and mortality rate & demographics, socioeconomic and mobility variables                           |
| Social Vulnerability and Racial Inequality in COVID-19 Deaths in Chicago <sup>42</sup>                 | <b>Design</b>            | Cohort study                                                                                                         |
|                                                                                                        | <b>Sample Size</b>       | 77 Chicago community areas                                                                                           |
|                                                                                                        | <b>Date</b>              | Not specified                                                                                                        |
|                                                                                                        | <b>Populations</b>       | African Americans and Other Racial/ Ethnic Groups                                                                    |
|                                                                                                        | <b>Location</b>          | Chicago                                                                                                              |

|                                                     |                                                                                     |                                                                                                        |
|-----------------------------------------------------|-------------------------------------------------------------------------------------|--------------------------------------------------------------------------------------------------------|
|                                                     | <b>Nature of Article</b>                                                            | Effects of social vulnerability and health risk factors on the spatial distribution of COVID-19 deaths |
| African American COVID-19 Disparities <sup>30</sup> | <b>Design</b>                                                                       | Ecological study using linear regression                                                               |
|                                                     | <b>Sample Size</b>                                                                  | 152 counties                                                                                           |
|                                                     | <b>Date</b>                                                                         | January 22nd - April 12th, 2020                                                                        |
|                                                     | <b>Populations</b>                                                                  | African Americans                                                                                      |
|                                                     | <b>Location</b>                                                                     | Top 3 most populous counties of each US state                                                          |
|                                                     | <b>Nature of Article</b>                                                            | Impact of the density of African American communities on COVID-19 prevalence and death rate            |
|                                                     | US County-Level Characteristics to Inform Equitable COVID-19 Response <sup>22</sup> | <b>Design</b>                                                                                          |
| <b>Sample Size</b>                                  |                                                                                     | Not specified                                                                                          |
| <b>Date</b>                                         |                                                                                     | Not specified                                                                                          |
| <b>Populations</b>                                  |                                                                                     | Non-Hispanic Blacks and non-Hispanic Whites                                                            |
| <b>Location</b>                                     |                                                                                     | -US nationwide                                                                                         |
| <b>Nature of Article</b>                            |                                                                                     | -Biological, demographic, and socioeconomic factors influencing susceptibility to COVID-19             |
